# Supplementary material for: TPI-287, a New Taxane Family Member, Reduces the Brain Metastatic Colonization of Breast Cancer Cells
Source: Oxford University Press journal article supplement (doi:10.1158/1535-7163.mct-12-0061), 2012-05-24
Supplement: 15357163mct120061-sup-fig1-2.pdf [file 15357163mct120061-sup-fig1-2.pdf]

## Supplementary Figures

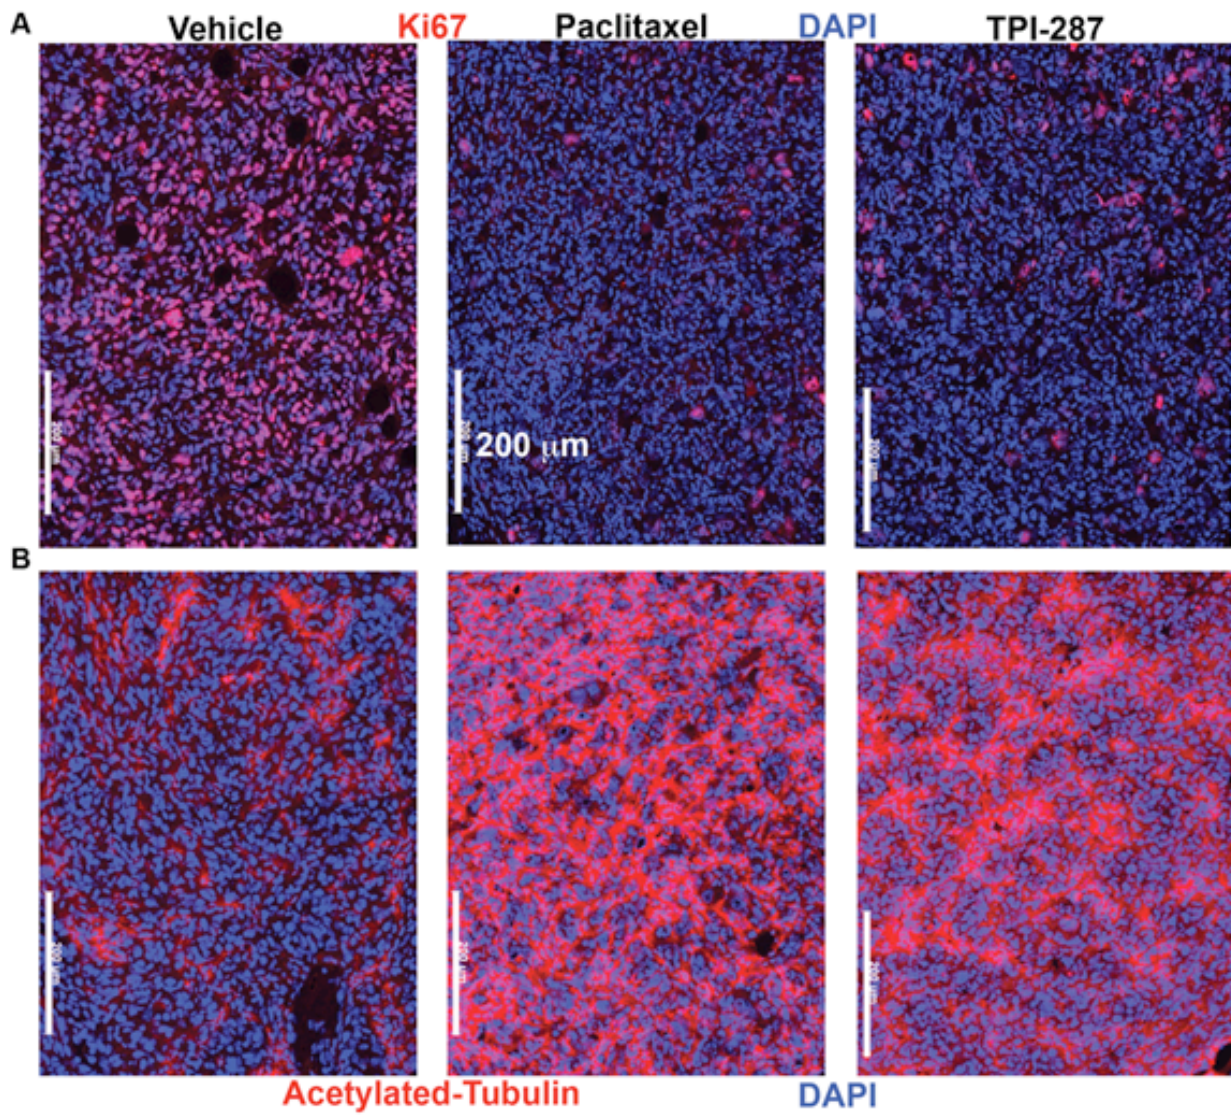

Supplemental Figure 1. Immunofluorescence analysis of primary 231-BR tumors. A. Immunofluorescence for Ki67 (red) in tumors from mice treated with vehicle (left), paclitaxel (middle) or TPI-287 (right). B. Immunofluorescence for acetylated tubulin (red) in tumors described in A. All tumor sections counterstained with DAPI (blue).

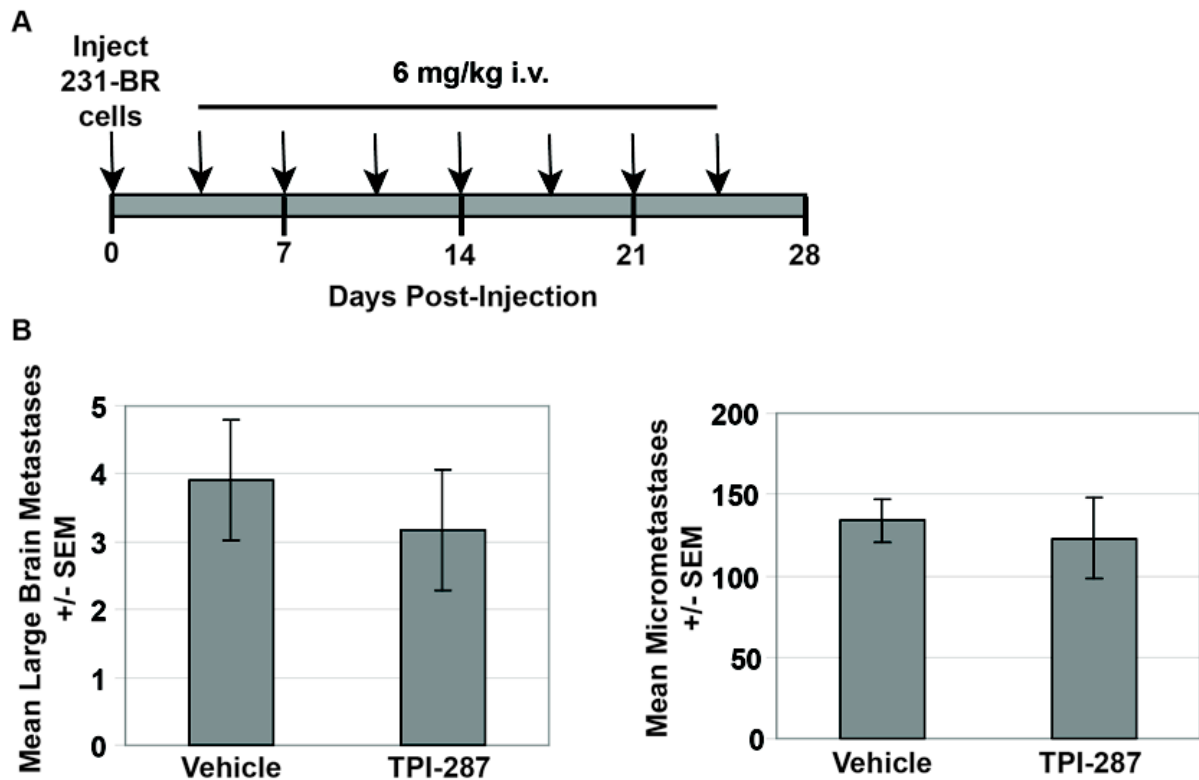

Supplemental Figure 2. TPI-287 prevention of 231-BR brain metastatic colonization. A. Experimental schema in which mice received 231-BR cells in the left cardiac ventricle, and were randomized to twice weekly vehicle or 6 mg/kg TPI-287 beginning on day 4 post-injection. B. Mean number of large brain metastases and micrometastases in histologic counts of ten step sections through one hemisphere of each brain. n=9 mice for vehicle and n=9 for TPI-287. TPI-287 means were not statistically significantly different from vehicle treatment means.
